# Supplementary material for: Association between Perceived Health-Related Quality of Life and Depression with Frailty in the FRASNET Study
Source: MDPI journal article supplement (doi:10.3390/ijerph192416776), 2022-12-14
Supplement: s1 [file s1]

## SUPPLEMENTARY MATERIALS

### METHODS

#### Psychometric Measurements

#### Immunological determinations

**Table S1.** Centers of enrolment of FRASNET volunteers (n = 1,250) in Milan (northern Italy) and nearby area.

**Table S2.** Descriptive statistics for measurement of cytokines.

**Table S3.** SNPs and allele frequencies among FRASNET participants.

**Table S4.** Linear regression analysis for SF-36-PCS.

**Table S5.** Linear regression analysis for SF-36-MCS.

**Table S6.** Nominal regression analysis for GDS-15.

**Table S7.** Logistic regression analysis for MMSE.

**Figure S1.** Binary tree computed by conditional recursive partitioning of frailty classes (0 = robust, 1 = pre-frail, 2 = frail subjects), including FN1 rs7567647 genetic variant. SF-36-PCS, SF-36-MCS, GDS-15 (0-5 = no depression, 6-9 = mild depression, 10-13 = depression), MMSE, sex, age groups, BMI classes, number of daily drugs ("Drugs"), absence or presence of caregiver (NO/YES), annual income, absence or presence of leisure activities (NO/YES), and level of education (School). The variables affecting frailty are SF-36-PCS, having or not a caregiver, SF-36-MCS, and *FN1* rs7567647 genetic variant.

## **METHODS**

### **Psychometric Measurements**

*SF-36 Medical Outcomes Study Questionnaire Short Form 36 (SF-36) health survey*

SF-36 have items that are divided into 8 sub-scales that can be conceptually referred to 8 health domains: Physical activity (AF), Role limitations due to health Physical Pain (PR), Role Limitations Due to Emotional State (ER), Physical Pain (BP), Perception of General Health (GH), Vitality (VT), Social Activities (SF), Mental Health (HD) and a single item on the change in health status.

The physical component summary (Short Form Survey-36-Physical Component Summary, SF-36-PCS) includes four scales: physical functioning (10 items), role-physical (4 items), bodily pain (2 items), and general health (5 items). The mental component summary (Short Form Survey-36-Mental Component Summary, SF-36-MCS) is composed of vitality (4 items), social functioning (2 items), role-emotional (3 items), and mental health (5 items).

### **Immunological determinations**

Level of twenty-five cytokines was measured using a commercially available multiplex bead-based sandwich immunoassay kit (Bio-Plex Pro Human Cytokine 27-Plex Immunoassay, Bio-Rad, Italy) as per the manufacturer's instructions. Briefly, plasma samples (25  $\mu$ L/well) or standards (25  $\mu$ L/well) were incubated with 25  $\mu$ L of the pre-mixed bead sets in pre-wetted 96-well microtiter plates at 4°C overnight. After washing, 25  $\mu$ L of the fluorescent detection antibody mixture were added for 30 min and 25  $\mu$ L of streptavidin-phycoerythrin were added to each well for an additional 30 min at room temperature.

In particular, epidermal growth factor (EGF), fibroblast growth factor 2 (FGF2), FMS-like tyrosine kinase 3 ligand (Flt-3L), granulocyte colony-stimulating factor (G-CSF), granulocyte-monocyte colony stimulating factor (GM-CSF), interferon- $\alpha$ 2 (IFN- $\alpha$ 2), IFN- $\gamma$ , interleukine (IL)-10, IL-15, IL-17, IL-1 $\beta$ , IL-2, IL-6, IL-8, C-X-C motif chemokine ligand 10 (CXCL10), C-C motif chemokine ligand 2 (CCL2), C-C motif chemokine ligand 4 (CCL4), platelet-derived growth factor-AA (PDGF-AA), soluble CD40 ligand (sCD40L), transforming growth factor alpha (TGF- $\alpha$ ), TNF- $\alpha$  and vascular endothelial growth factor (VEGF) were included in the immunoassay kit.

**Table S1. Centers of enrolment of FRASNET volunteers (n = 1,250) in Milan (northern Italy) and nearby area.**

| Center                            | Location                 | Period                        | n   |
|-----------------------------------|--------------------------|-------------------------------|-----|
| San Raffaele Scientific Institute | Milano                   | April 2017 - October 2020     | 631 |
| Università del Tempo Libero Auser | Milano                   | April 2018                    | 43  |
| RSA Santa Giulia                  | Milano                   | May 2018                      | 8   |
| Università del Tempo Libero Auser | Seregno (MB)             | May 2018 - January 2019       | 159 |
| Casa di Riposo Agostoni           | Lissone (MB)             | January 2019                  | 11  |
| Cuggiono Hospital                 | Cuggiono (MI)            | February 2019                 | 8   |
| Centro Ricreativo Anziani         | Gorgonzola (MI)          | March 2019 - May 2019         | 107 |
| Movimento Terza Età               | Carugate (MI)            | May 2019 - October 2019       | 63  |
| Residenza Amica                   | Giussano (MB)            | October 2019                  | 40  |
| Ca' Vera                          | Giussano (MB)            | November 2019- January 2020   | 64  |
| Associazione Pensionati           | Pessano con Bornago (MI) | November 2019 - December 2019 | 53  |
| Centro Anziani                    | Segrate (MI)             | January 2020 - February 2020  | 63  |

Notes: MB = Monza e Brianza; MI = Milano.

**Table S2. Descriptive statistics for measurement of cytokines.**

| <b>Cytokine (pg/mL)</b> | <b>N</b> | <b>Means</b> | <b>SD</b> | <b>SE</b> | <b>Minimum</b> | <b>Maximum</b> |
|-------------------------|----------|--------------|-----------|-----------|----------------|----------------|
| Eotaxin                 | 75       | 80.43        | 45.93     | 5.30      | 26.16          | 279.07         |
| FGF2                    | 75       | 30.46        | 9.34      | 1.08      | 11.23          | 55.12          |
| G-CSF                   | 75       | 84.19        | 47.01     | 5.43      | 11.76          | 271.51         |
| IFN- $\gamma$           | 74       | 4.99         | 4.07      | 0.47      | 0              | 21.83          |
| IL-1 $\beta$            | 75       | 1.87         | 1.99      | 0.23      | 0.01           | 10.15          |
| IL-2                    | 75       | 2.84         | 1.87      | 0.22      | 0              | 8.81           |
| IL-4                    | 75       | 6.06         | 2.09      | 0.24      | 2.87           | 14.47          |
| IL-5                    | 37       | 10.03        | 5.78      | 0.95      | 1.69           | 24.60          |
| IL-6                    | 75       | 3.24         | 3.98      | 0.46      | 0              | 24.45          |
| IL-7                    | 75       | 28.71        | 13.91     | 1.61      | 3.51           | 72.31          |
| IL-8                    | 75       | 5.95         | 4.22      | 0.49      | 0              | 22.18          |
| IL-9                    | 75       | 267.83       | 77.51     | 8.95      | 82.01          | 504.74         |
| IL-10                   | 37       | 5.93         | 3.01      | 0.50      | 0.08           | 16.70          |
| IL-12_p70               | 37       | 2.26         | 1.89      | 0.31      | 0.12           | 7.40           |
| IL-13                   | 75       | 9.08         | 8.49      | 0.98      | 0              | 43.93          |
| IL-17                   | 75       | 8.74         | 3.45      | 0.40      | 3.60           | 21.50          |
| ILra                    | 75       | 232.14       | 108.99    | 12.58     | 90.56          | 747.16         |
| CXCL10                  | 75       | 667.08       | 324.98    | 37.53     | 232.88         | 1753.08        |
| CCL2                    | 75       | 24.16        | 13.80     | 1.59      | 0              | 56.89          |
| CCL4                    | 75       | 81.39        | 19.98     | 2.31      | 31.84          | 137.57         |
| CCL3                    | 75       | 2.58         | 1.12      | 0.13      | 0.82           | 7.24           |
| PDGF-bb                 | 75       | 431.14       | 422.39    | 48.77     | 0              | 2573.94        |
| CCL5                    | 75       | 3316.41      | 2136.42   | 246.69    | 546.99         | 9216.97        |
| TNF- $\alpha$           | 75       | 50.31        | 20.03     | 2.31      | 21.13          | 110.05         |
| VEGF                    | 75       | 121.54       | 84.11     | 9.71      | 0              | 363.26         |

Notes: fibroblast growth factor 2 (FGF2), granulocyte colony-stimulating factor (G-CSF); interferon  $\gamma$  (IFN- $\gamma$ ); interleukin (IL)-1 $\beta$ , IL-2, IL-4, IL-5, IL-6, IL-7, IL-8, IL-9, IL-10, IL-12\_p70, IL-13, IL-17, IL-ra; C-X-C motif chemokine ligand 10 (CXCL10); C-C motif chemokine ligand 2 (CCL2); C-C motif chemokine ligand 3 (CCL3); C-C motif chemokine ligand 4 (CCL4); platelet-derived growth factor-bb (PDGF-bb); C-C motif chemokine ligand 5 (CCL5); tumor necrosis factor (TNF- $\alpha$ ); vascular endothelial growth factor (VEGF).

**Table S3. SNPs and allele frequencies among FRASNET participants.**

| SNP        | Gene          | Chr | position<br>(bp) | Alleles<br>(minor/<br>major) | MAF   | H-W   | Reference |
|------------|---------------|-----|------------------|------------------------------|-------|-------|-----------|
| rs10883631 | <i>BTRC</i>   | 10  | 101379138        | A/G                          | 0.497 | 0.767 | 18        |
| rs6747918  | <i>CASP8</i>  | 2   | 201232852        | G/A                          | 0.487 | 0.616 | 18        |
| rs129968   | <i>CREBBP</i> | 16  | 3741260          | A/G                          | 0.373 | 0.998 | 18        |
| rs7567647  | <i>FN1</i>    | 2   | 215432137        | A/G                          | 0.195 | 0.773 | 18        |
| rs2287396  | <i>GSTZ1</i>  | 14  | 77327849         | T/C                          | 0.188 | 0.746 | 18        |
| rs2929408  | <i>KAT2B</i>  | 3   | 20041477         | T/G                          | 0.226 | 0.386 | 18        |
| rs1050993  | <i>MTR</i>    | 1   | 236899005        | A/G                          | 0.446 | 0.387 | 18        |
| rs1400657  | <i>STAT1</i>  | 2   | 190968814        | C/A                          | 0.130 | 0.237 | 18        |
| rs2833383  | <i>TIAM1</i>  | 21  | 31343131         | T/C                          | 0.274 | 0.536 | 18        |
| rs1800169  | <i>CNTF</i>   | 11  | 58624028         | A/G                          | 0.166 | 0.141 | 19        |
| rs1800795  | <i>IL6</i>    | 7   | 22727026         | C/G                          | 0.318 | 0.672 | 20        |
| rs1800469  | <i>TGFB1</i>  | 19  | 41354391         | T/C                          | 0.363 | 0.042 | 21        |
| rs17042917 | <i>IL1RN</i>  | 2   | 113113086        | A/G                          | 0.080 | 0.063 | 22        |
| rs4251961  | <i>IL1RN</i>  | 2   | 113116890        | C/T                          | 0.398 | 0.138 | 22        |
| rs3865444  | <i>CD33</i>   | 19  | 51224706         | T/G                          | 0.277 | 0.532 | 23        |
| rs12552    | <i>OLFM4</i>  | 13  | 53051646         | T/C                          | 0.453 | 0.571 | 24        |

Notes: SNPs chromosome positions based on GRCh38 (release 108) assembly. SNP = Single Nucleotide Polymorphism; Chr = chromosome; bp = base pair; MAF = Minor Allele Frequency; H-W = Hardy-Weinberg equilibrium *p* value.

**Table S4. Linear regression analysis for SF-36-PCS.**

| Parameter     | OR   | CI 95%      | p-value         |
|---------------|------|-------------|-----------------|
| BMI classes   | 0.96 | [0.83-1.11] | 0.598           |
| Daily drugs   | 1.24 | [1.11-1.39] | <b>1.57E-04</b> |
| Caregiver     | 1.15 | [0.92-1.44] | 0.211           |
| School years  | 0.85 | [0.75-0.95] | <b>0.006</b>    |
| Annual income | 1.06 | [0.72-1.56] | 0.761           |
| SF-36-PCS     | 0.51 | [0.44-0.57] | <b>7.81E-26</b> |

Notes: BMI = body mass index; SF-36-PCS = Short Form Survey-36-Physical Component Summary.

**Table S5. Linear regression analysis for SF-36-MCS.**

| Parameter     | OR   | CI 95%      | p-value         |
|---------------|------|-------------|-----------------|
| BMI classes   | 0.96 | [0.83-1.11] | 0.591           |
| Daily drugs   | 1.36 | [1.22-1.52] | <b>3.84E-08</b> |
| Caregiver     | 1.02 | [0.82-1.27] | 0.851           |
| School years  | 0.8  | [0.71-0.9]  | <b>2.17E-04</b> |
| Annual income | 0.88 | [0.6-1.28]  | 0.491           |
| SF-36-MCS     | 0.63 | [0.56-0.71] | <b>7.42E-15</b> |

Notes: BMI = body mass index; SF-36-MCS = Short Form Survey-36-Mental Component Summary.

**Table S6. Nominal regression analysis for GDS-15.**

| Parameter          | OR   | CI 95%      | p-value         |
|--------------------|------|-------------|-----------------|
| Sex                | 1.08 | [0.85-1.36] | 0.524           |
| Age groups         | 1.58 | [1.26-1.99] | <b>6.79E-05</b> |
| BMI classes        | 0.95 | [0.82-1.1]  | 0.481           |
| Daily drugs        | 1.24 | [1.11-1.39] | <b>2.37E-04</b> |
| Caregiver          | 1.20 | [0.96-1.5]  | 0.117           |
| School years       | 0.81 | [0.72-0.92] | <b>9.35E-04</b> |
| Leisure activities | 0.60 | [0.46-0.78] | <b>1.89E-04</b> |
| Annual income      | 1.11 | [0.75-1.65] | 0.592           |
| GDS-15 classes     | 2.51 | [1.95-3.28] | <b>4.29E-12</b> |

Notes: GDS-15 = Geriatric Depression Scale.

**Table S7. Logistic regression analysis for MMSE.**

| <b>Parameter</b>   | <b>OR</b> | <b>CI 95%</b> | <b>p-value</b>  |
|--------------------|-----------|---------------|-----------------|
| Sex                | 1.22      | [0.98-1.53]   | 0.081           |
| BMI classes        | 0.96      | [0.84-1.11]   | 0.604           |
| Daily drugs        | 1.39      | [1.25-1.55]   | <b>1.61E-09</b> |
| Caregiver          | 1.14      | [0.92-1.42]   | 0.238           |
| Leisure activities | 0.57      | [0.44-0.74]   | <b>2.13E-05</b> |
| Annual income      | 0.87      | [0.6-1.26]    | 0.456           |
| MMSE classes       | 0.56      | [0.35-0.89]   | <b>0.014</b>    |

*Notes:* MMSE = Mini-Mental State Examination

**Figure S1. Binary tree computed by conditional recursive partitioning of frailty classes (0 = robust, 1 = pre-frail, 2 = frail subjects), including FN1 rs7567647 genetic variant.**

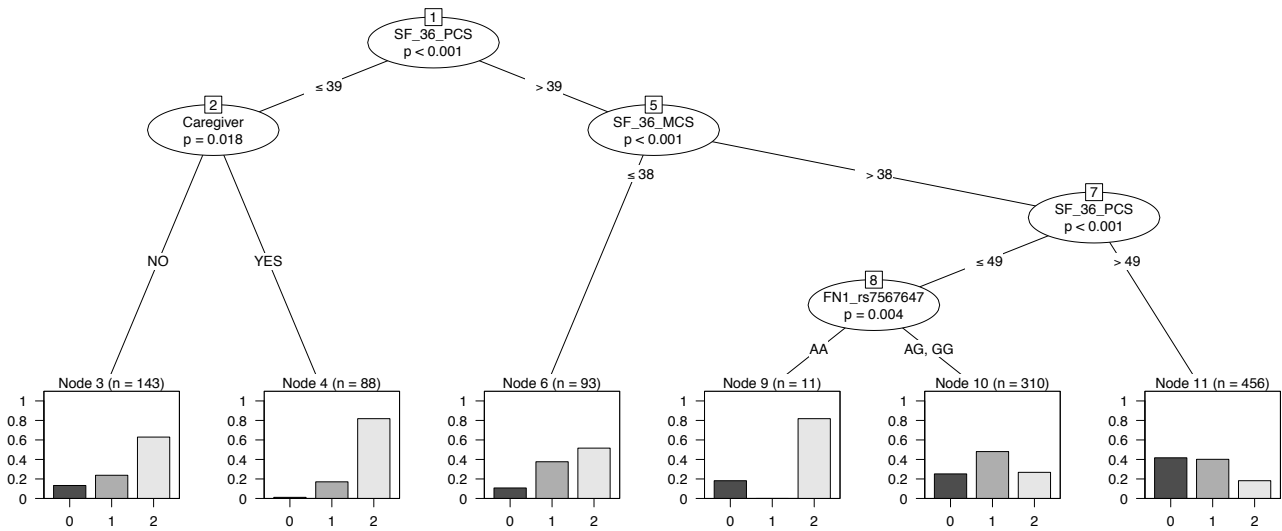

SF-36-PCS, SF-36-MCS, GDS-15 (0-5 = no depression, 6-9 = mild depression, 10-13 = depression), MMSE, sex, age groups, BMI classes, number of daily drugs ("Drugs"), absence or presence of caregiver (NO/YES), annual income, absence or presence of leisure activities (NO/YES), and level of education (School).
